# Supplementary material
Source: PubMed Central journal article supplement (PMC4392080)

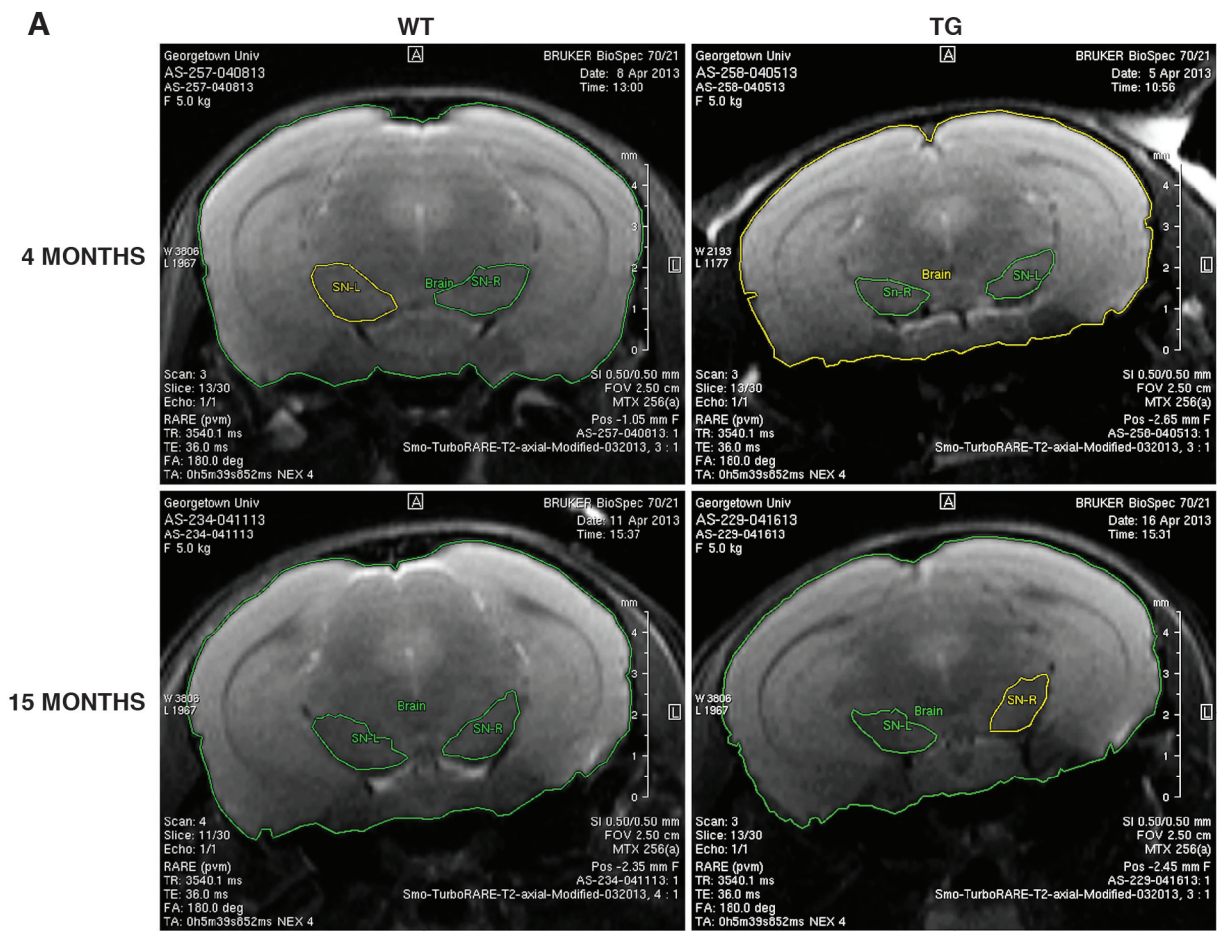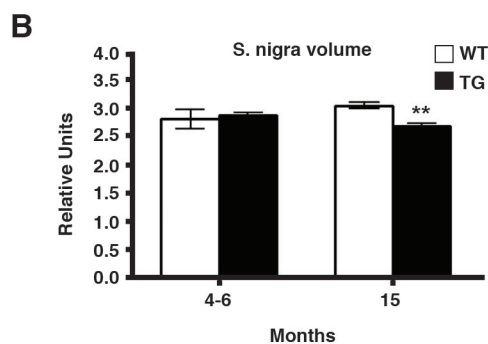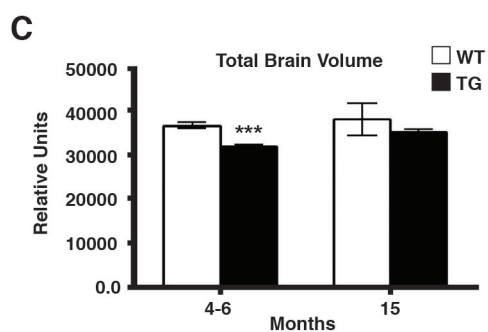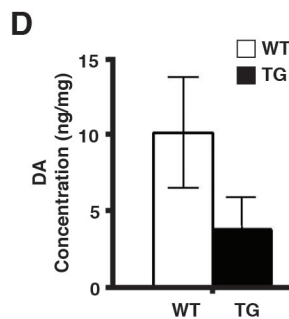

Figure S2.

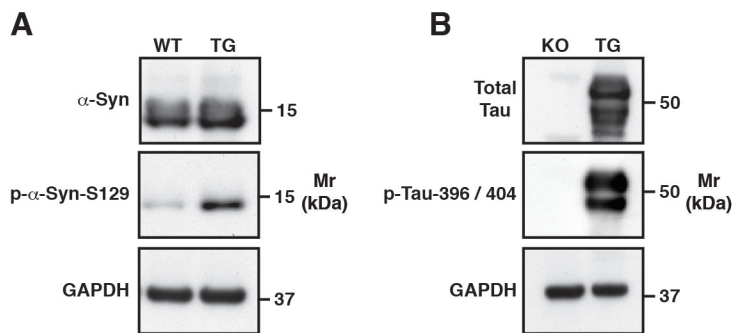

**Figure S3.**

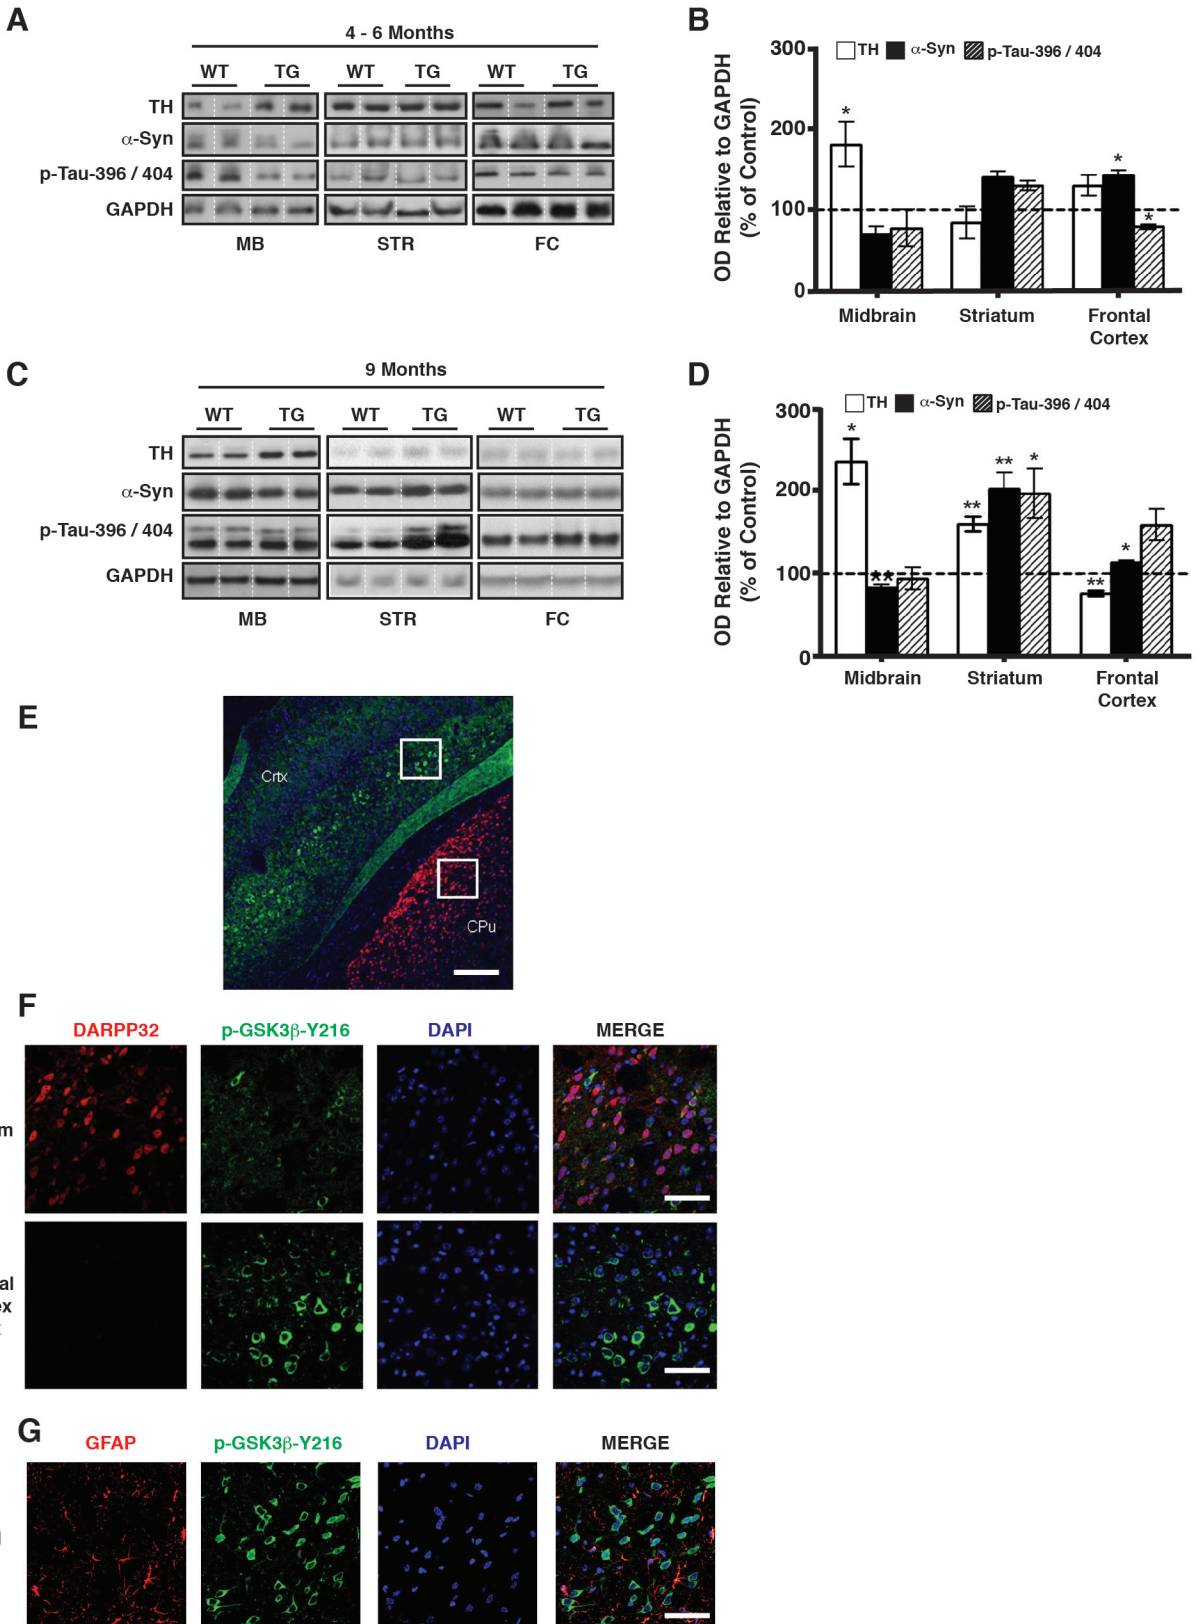



Figure S5.

A

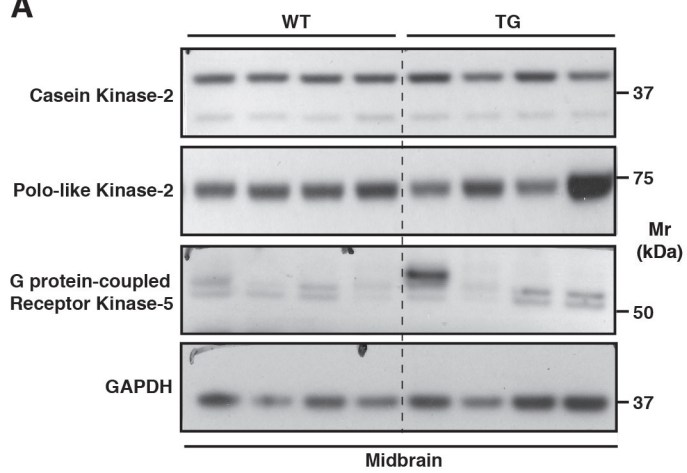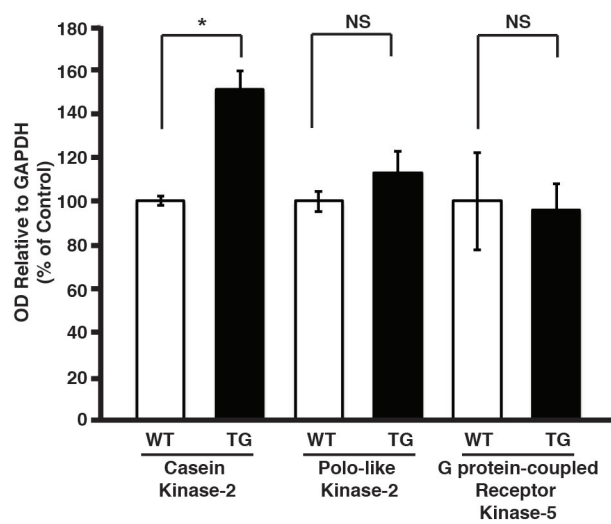

Supplement: cdd2014179x2.pdf [file cdd2014179x2.pdf]
